# Supplementary material for: The role of secondary phase in enhancing transduction coefficient of piezoelectric energy harvesting composites
Source: Royal Society of Chemistry journal article supplement (doi:10.1039/c9tc00322c), 2019-01-01
Supplement: c9tc00322c1.pdf [file c9tc00322c1.pdf]

## **Supplementary material**

### **The role of secondary phase in enhancing transduction coefficient of piezoelectric energy harvesting composites**

Xiaole Yu, Yudong Hou,\* Haiyan Zhao, Jing Fu, Mupeng Zheng, Mankang Zhu

College of Materials Science and Engineering, Key Laboratory of Advanced Functional Materials, Education Ministry of China, Beijing University of Technology, Beijing 100124, China

---

\*Author to whom correspondence should be addressed. E-mail: [ydhoul@bjut.edu.cn](mailto:ydhoul@bjut.edu.cn)

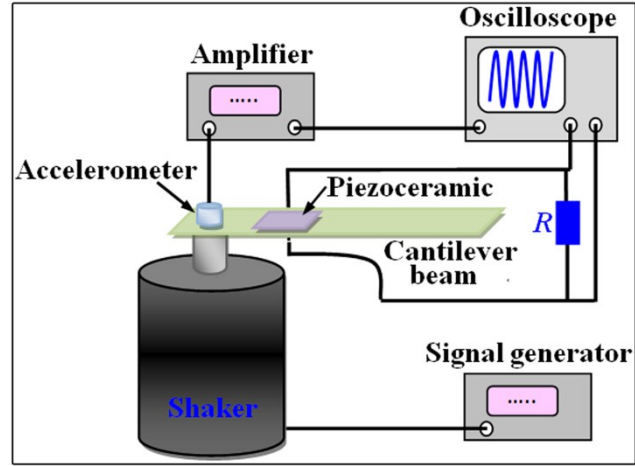

**Fig. S1** The schematic diagram of the PEHs system.

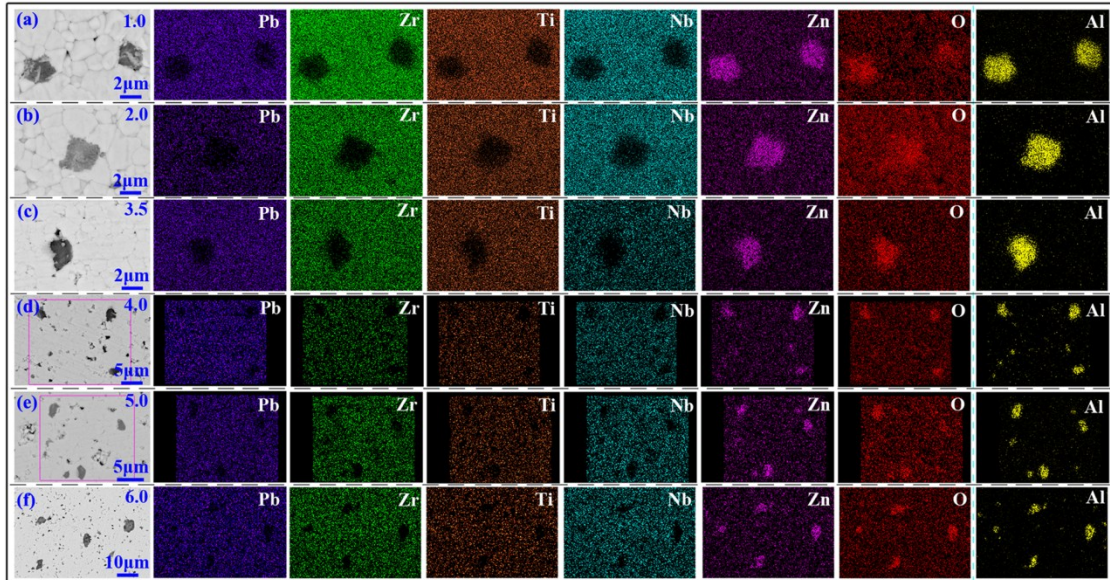

**Fig. S2** Backscattered electron SEM image and corresponding element distribution mapping of PZN-PZT +  $x$  mol.% AlN ceramics: (a)  $x=1.0$ , (b)  $x=2.0$ , (c)  $x=3.5$ , (d)  $x=4.0$ , (e)  $x=5.0$ , (f)  $x=6.0$ .

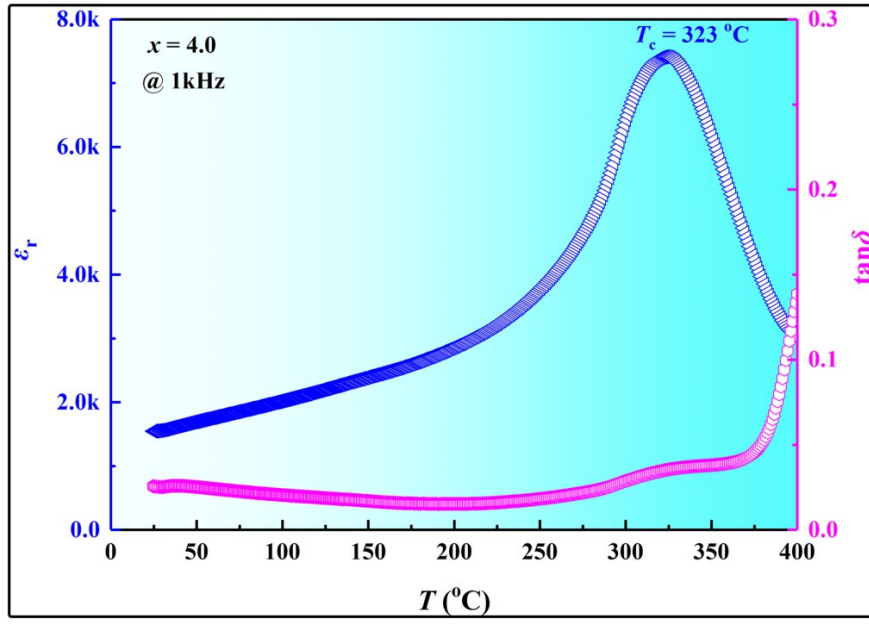

**Fig. S3** Temperature dependence of dielectric properties measured at 1 kHz for poled  $x=4.0$  composite.

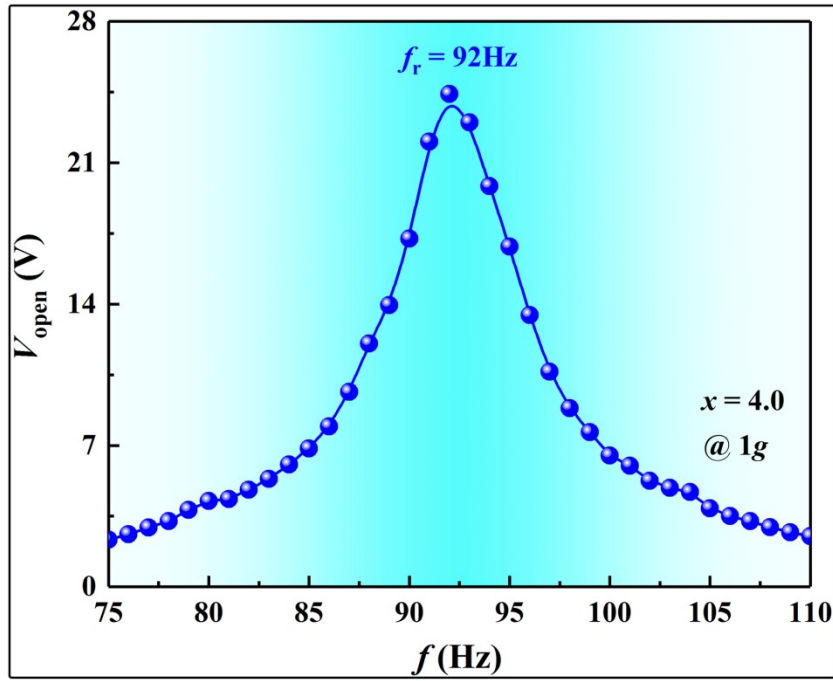

**Fig. S4** The open circuit voltage ( $V_{\text{open}}$ ) as a function of frequency ( $f$ ) for the  $x=4.0$  PEHs.

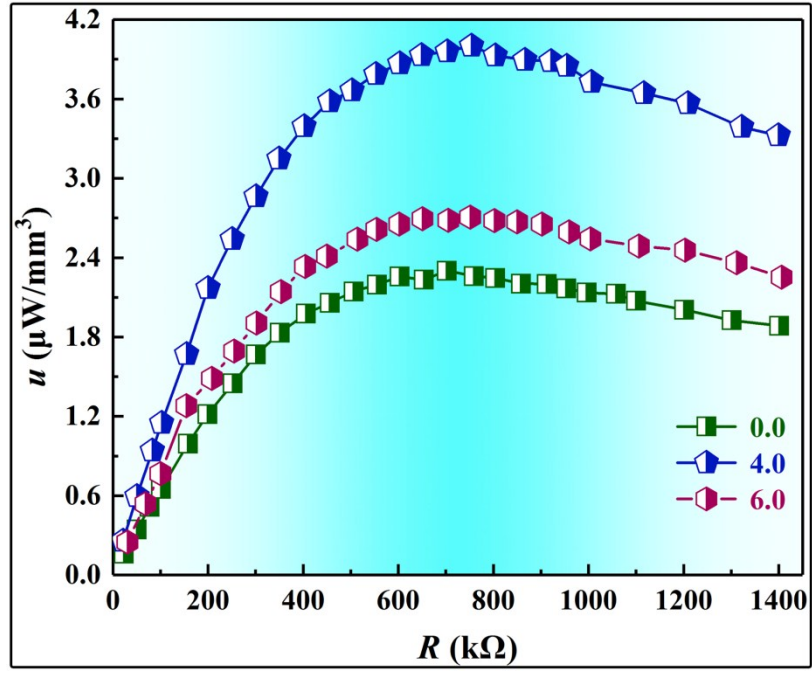

**Fig. S5** Output power density ( $u$ ) as a function of load resistance ( $R$ ) for  $x = 0.0, 4.0$  and  $6.0$  PEHs at  $1\text{ g}$  acceleration.
